# Supplementary material for: One-step multiplex real-time RT-PCR assay for detecting and genotyping wild-type group A rotavirus strains and vaccine strains (Rotarix® and RotaTeq®) in stool samples
Source: PeerJ. 2016 Jan 11;4:e1560. doi: 10.7717/peerj.1560 (PMC4734446; doi:10.7717/peerj.1560)
Supplement: Supplemental Information 10 [file peerj-04-1560-s010.xlsx]

## Sheet: Sheet1
Concentration	Dillution	Volume (uL)	Mass (ng)	Length, bp	Copy number	Log copy	Ct	Ct	Ct avarage
ng/uL		(sample/assay)		(amplicon)
9.6	0.1	0.2	0.192	1000	1.75215e+08	8.24357
9.6	0.01	0.2	0.0192	1000	1.75215e+07	7.24357	14.13	14.06	14.24
9.6	0.001	0.2	0.00192	1000	1.75215e+06	6.24357	16.92	16.92	17.13
9.6	0.0001	0.2	0.000192	1000	175215	5.24357	20.17	20.13	20.15
9.6	1e-05	0.2	1.92e-05	1000	17521.5	4.24357	23.3	23.38	23.34
9.6	1e-06	0.2	1.92e-06	1000	1752.15	3.24357	26.58	26.75	26.665
9.6	1e-07	0.2	1.92e-07	1000	175.215	2.24357	30.12	30	30.06
9.6	1e-08	0.2	1.92e-08	1000	17.5215	1.24357	36.14	34.56	35.35
9.6	1e-09	0.2	1.92e-09	1000	1.75215	0.24357
9.6	1e-10	0.2	1.92e-10	1000	0.175215	-0.75643
9.6	1e-11	0.2	1.92e-11	1000	0.0175215	-1.75643
9.6	1e-12	0.2	1.92e-12	1000	0.00175215	-2.75643
9.6	1e-13	0.2	1.92e-13	1000	0.000175215	-3.75643
9.6	1e-14	0.2	1.92e-14	1000	1.75215e-05	-4.75643
9.6	1e-15	0.2	1.92e-15	1000	1.75215e-06	-5.75643
9.6	1e-16	0.2	1.92e-16	1000	1.75215e-07	-6.75643				slope	-3.418
9.6	1e-17	0.2	1.92e-17	1000	1.75215e-08	-7.75643				efficiency	0.961412
										%	96.1412
This calculation is based on the assumption that the average weight of a base pair (bp) is 650 Daltons.
This means that one mole of a bp weighs 650 g and that the molecular weight of any double stranded DNA template can be estimated by taking the product of its length (in bp) and 650.
The inverse of the molecular weight is the number of moles of template present in one gram of material.
Using Avogadro's number, 6.022x1023 molecules/mole, the number of molecules of the template per gram can be calculated:
mol/g * molecules/mol = molecules/ g
Finally, the number of molecules or number of copies of template in the sample can be estimated by multiplying by 1*109 to convert to ng and then multiplying by the amount of template (in ng)
This calculator requires the user to input the amount of a template present (in ngs) and the length of the template (in bp) and with this information the number of copies of the template is calculated.
The formula used is:
number of copies = ( amount * 6.022x1023) / (length * 1x109 * 650)
number = (ng * number/mole) / (bp * ng/g * g/ mole of bp)

## Sheet: Sheet2
Plate 1
DASH	Ct	Ct	Avarage Ct	Log copy	#/uL RNA	#/mL stool.
2009727244	undet	undet	undet	undet	undet	undet
2009808091	undet	undet	undet	undet	undet	undet
2009808110	23.0964		23.0964	3.5422	3484.95	348495
2009808111	13.3549	13.3346	13.3448	6.33765	2.17594e+06	2.17594e+08
2009808114	15.1465	15.1339	15.1402	5.82296	665206	6.65206e+07
2009808119	18.855	18.9057	18.8803	4.75079	56336.3	5.63363e+06
2009808120	undet	undet	undet	undet	undet	undet
2009808129	19.2328	19.2309	19.2319	4.65003	44671	4.4671e+06
2009808131	40.2926		40.2926	-1.38734	0.0409882	4.09882
2009808167	undet	undet	undet	undet	undet	undet
2009808181	undet	undet	undet	undet	undet	undet
2009808184	13.8849	13.7948	13.8399	6.19572	1.56935e+06	1.56935e+08
2009808190	14.5639	14.7163	14.6401	5.96632	925373	9.25373e+07
2009808204	19.8232	19.6316	19.7274	4.50797	32208.4	3.22084e+06
2009808206	undet	undet	undet	undet	undet	undet
2009808292	undet	undet	undet	undet	undet	undet
2009808511		40.4274	40.4274	-1.42598	0.0374987	3.74987
2009726985	15.2956	15.2576	15.2766	5.78386	607932	6.07932e+07
2009726986	16.3439	16.2296	16.2868	5.49428	312091	3.12091e+07
2009726987	14.3197	14.3192	14.3194	6.05824	1.1435e+06	1.1435e+08
2009726988	15.7345	15.4142	15.5743	5.6985	499460	4.9946e+07
2009726989	14.4029	14.2821	14.3425	6.05163	1.12623e+06	1.12623e+08
2009726990	13.5553	13.5462	13.5508	6.27859	1.89931e+06	1.89931e+08
2009726991	18.5382	18.4654	18.5018	4.85931	72327.8	7.23278e+06
2009726992	undet	undet	undet	undet	undet	undet
2009726993	19.801		19.801	4.48687	30681.1	3.06811e+06
2009726994	16.1159	15.7943	15.9551	5.58935	388466	3.88466e+07
2009726995	undet	undet	undet	undet	undet	undet
2009726996	14.1732	14.0346	14.1039	6.12003	1.31834e+06	1.31834e+08
2009726997	15.0907	18.1226	16.6066	5.40258	252684	2.52684e+07
2009726998	23.0746	23.3188	23.1967	3.51344	3261.7	326170
2009726999	19.0378	18.5477	18.7927	4.7759	59689.8	5.96898e+06
2009727000	18.2229	18.38	18.3014	4.91674	82554	8.2554e+06
2009727001	14.9123	15.092	15.0022	5.86253	728669	7.28669e+07
2009727002	15.981	15.7164	15.8487	5.61985	416730	4.1673e+07
2009727003	20.8631	20.6834	20.7732	4.20816	16149.6	1.61496e+06
2009727004	13.3997	13.5043	13.452	6.3069	2.02723e+06	2.02723e+08
2009727005	19.3043	19.4034	19.3539	4.61505	41214.8	4.12148e+06
2009727063	16.0136	15.9789	15.9962	5.57756	378057	3.78057e+07
2009727064	15.6834	15.5323	15.6078	5.6889	488537	4.88537e+07

## Sheet: Compatibility Report
	Compatibility Report for 2011.05.02 Efficiency and copy number calculation-positive plate 1.xls
	Run on 5/2/2011 15:54
	The following features in this workbook are not supported by earlier versions of Excel. These features may be lost or degraded when you save this workbook in an earlier file format.
	Minor loss of fidelity			# of occurrences
	Some cells or styles in this workbook contain formatting that is not supported by the selected file format. These formats will be converted to the closest format available.			5
