# Supplementary material for: One-step multiplex real-time RT-PCR assay for detecting and genotyping wild-type group A rotavirus strains and vaccine strains (Rotarix® and RotaTeq®) in stool samples
Source: PeerJ. 2016 Jan 11;4:e1560. doi: 10.7717/peerj.1560 (PMC4734446; doi:10.7717/peerj.1560)
Supplement: Supplemental Information 11 [file peerj-04-1560-s011.xls]

## Sheet: Sheet1
Concentration	Dillution	Volume (uL)	Mass (ng)	Length, bp	Copy number	Log copy	Ct	Ct	Ct avarage
ng/uL		(sample/assay)		(amplicon)
8.7	0.1	0.2	0.174	1062	1.49518e+08	8.17469
8.7	0.01	0.2	0.0174	1062	1.49518e+07	7.17469
8.7	0.001	0.2	0.00174	1062	1.49518e+06	6.17469	16.84	16.91	16.875
8.7	0.0001	0.2	0.000174	1062	149518	5.17469	20.64	20.53	20.585
8.7	1e-05	0.2	1.74e-05	1062	14951.8	4.17469	24.82	24.39	24.605
8.7	1e-06	0.2	1.74e-06	1062	1495.18	3.17469	28.18	28.38	28.28
8.7	1e-07	0.2	1.74e-07	1062	149.518	2.17469	32.44	29.78	31.11
8.7	1e-08	0.2	1.74e-08	1062	14.9518	1.17469
8.7	1e-09	0.2	1.74e-09	1062	1.49518	0.174694
8.7	1e-10	0.2	1.74e-10	1062	0.149518	-0.825306
8.7	1e-11	0.2	1.74e-11	1062	0.0149518	-1.82531
8.7	1e-12	0.2	1.74e-12	1062	0.00149518	-2.82531
8.7	1e-13	0.2	1.74e-13	1062	0.000149518	-3.82531
8.7	1e-14	0.2	1.74e-14	1062	1.49518e-05	-4.82531
8.7	1e-15	0.2	1.74e-15	1062	1.49518e-06	-5.82531
8.7	1e-16	0.2	1.74e-16	1062	1.49518e-07	-6.82531				slope	-3.6165
8.7	1e-17	0.2	1.74e-17	1062	1.49518e-08	-7.82531				efficiency	0.890212
										%	89.0212
This calculation is based on the assumption that the average weight of a base pair (bp) is 650 Daltons. This means that one mole of a bp weighs 650 g and that the molecular weight of any double stranded DNA template can be estimated by taking the product of its length (in bp) and 650.
The inverse of the molecular weight is the number of moles of template present in one gram of material.
Using Avogadro's number, 6.022x1023 molecules/mole, the number of molecules of the template per gram can be calculated:
mol/g * molecules/mol = molecules/ g
Finally, the number of molecules or number of copies of template in the sample can be estimated by multiplying by 1*109 to convert to ng and then multiplying by the amount of template (in ng)
This calculator requires the user to input the amount of a template present (in ngs) and the length of the template (in bp) and with this information the number of copies of the template is calculated.
The formula used is:
number of copies = ( amount * 6.022x1023) / (length * 1x109 * 650)
number = (ng * number/mole) / (bp * ng/g * g/ mole of bp)
