# Supplementary material for: One-step multiplex real-time RT-PCR assay for detecting and genotyping wild-type group A rotavirus strains and vaccine strains (Rotarix® and RotaTeq®) in stool samples
Source: PeerJ. 2016 Jan 11;4:e1560. doi: 10.7717/peerj.1560 (PMC4734446; doi:10.7717/peerj.1560)
Supplement: Supplemental Information 13 [file peerj-04-1560-s013.xls]

## Sheet: Sheet1
Concentration	Dillution	Volume (uL)	Mass (ng)	Length, bp	Copy number	Log copy	Ct	Ct	Ct average
ng/uL		(sample/assay)		(amplicon)
16.6	0.1	0.2	0.332	2362	1.28271e+08	8.10813
16.6	0.01	0.2	0.0332	2362	1.28271e+07	7.10813
16.6	0.001	0.2	0.00332	2362	1.28271e+06	6.10813	16.12	16.49	16.305
16.6	0.0001	0.2	0.000332	2362	128271	5.10813	17.78	18.78	18.28
16.6	1e-05	0.2	3.32e-05	2362	12827.1	4.10813	23.03	22.32	22.675
16.6	1e-06	0.2	3.32e-06	2362	1282.71	3.10813	26.54	26.15	26.34
16.6	1e-07	0.2	3.32e-07	2362	128.271	2.10813	32	30.87	31.43
16.6	1e-08	0.2	3.32e-08	2362	12.8271	1.10813
16.6	1e-09	0.2	3.32e-09	2362	1.28271	0.108127
16.6	1e-10	0.2	3.32e-10	2362	0.128271	-0.891873
16.6	1e-11	0.2	3.32e-11	2362	0.0128271	-1.89187
16.6	1e-12	0.2	3.32e-12	2362	0.00128271	-2.89187
16.6	1e-13	0.2	3.32e-13	2362	0.000128271	-3.89187
16.6	1e-14	0.2	3.32e-14	2362	1.28271e-05	-4.89187
16.6	1e-15	0.2	3.32e-15	2362	1.28271e-06	-5.89187
16.6	1e-16	0.2	3.32e-16	2362	1.28271e-07	-6.89187				slope	-3.831
16.6	1e-17	0.2	3.32e-17	2362	1.28271e-08	-7.89187				efficiency	0.824015
										%	82.4015
This calculation is based on the assumption that the average weight of a base pair (bp) is 650 Daltons. This means that one mole of a bp weighs 650 g and that the molecular weight of any double stranded DNA template can be estimated by taking the product of its length (in bp) and 650.
The inverse of the molecular weight is the number of moles of template present in one gram of material.
Using Avogadro's number, 6.022x1023 molecules/mole, the number of molecules of the template per gram can be calculated:
mol/g * molecules/mol = molecules/ g
Finally, the number of molecules or number of copies of template in the sample can be estimated by multiplying by 1*109 to convert to ng and then multiplying by the amount of template (in ng)
This calculator requires the user to input the amount of a template present (in ngs) and the length of the template (in bp) and with this information the number of copies of the template is calculated.
The formula used is:
number of copies = ( amount * 6.022x1023) / (length * 1x109 * 650)
number = (ng * number/mole) / (bp * ng/g * g/ mole of bp)
