# Supplementary material for: One-step multiplex real-time RT-PCR assay for detecting and genotyping wild-type group A rotavirus strains and vaccine strains (Rotarix® and RotaTeq®) in stool samples
Source: PeerJ. 2016 Jan 11;4:e1560. doi: 10.7717/peerj.1560 (PMC4734446; doi:10.7717/peerj.1560)
Supplement: Supplemental Information 14 [file peerj-04-1560-s014.xls]

## Sheet: Sheet1
Concentration	Dillution	Volume (uL)	Mass (ng)	Length, bp	Copy number	Log copy	Ct	Ct	Ct avarage
ng/uL		(sample/assay)		(amplicon)
24.6	0.1	0.2	0.492	1062	4.22775e+08	8.62611
24.6	0.01	0.2	0.0492	1062	4.22775e+07	7.62611
24.6	0.001	0.2	0.00492	1062	4.22775e+06	6.62611	15.29	15.21	15.25
24.6	0.0001	0.2	0.000492	1062	422775	5.62611	18.11	17.61	17.86
24.6	1e-05	0.2	4.92e-05	1062	42277.5	4.62611	21.64	21.21	21.425
24.6	1e-06	0.2	4.92e-06	1062	4227.75	3.62611	24.68	25.16	24.92
24.6	1e-07	0.2	4.92e-07	1062	422.775	2.62611	30.75	29.57	30.16
24.6	1e-08	0.2	4.92e-08	1062	42.2775	1.62611
24.6	1e-09	0.2	4.92e-09	1062	4.22775	0.62611
24.6	1e-10	0.2	4.92e-10	1062	0.422775	-0.37389
24.6	1e-11	0.2	4.92e-11	1062	0.0422775	-1.37389
24.6	1e-12	0.2	4.92e-12	1062	0.00422775	-2.37389
24.6	1e-13	0.2	4.92e-13	1062	0.000422775	-3.37389
24.6	1e-14	0.2	4.92e-14	1062	4.22775e-05	-4.37389
24.6	1e-15	0.2	4.92e-15	1062	4.22775e-06	-5.37389
24.6	1e-16	0.2	4.92e-16	1062	4.22775e-07	-6.37389				slope	-3.688
24.6	1e-17	0.2	4.92e-17	1062	4.22775e-08	-7.37389				efficiency	0.867023
										%	86.7023
This calculation is based on the assumption that the average weight of a base pair (bp) is 650 Daltons. This means that one mole of a bp weighs 650 g and that the molecular weight of any double stranded DNA template can be estimated by taking the product of its length (in bp) and 650.
The inverse of the molecular weight is the number of moles of template present in one gram of material.
Using Avogadro's number, 6.022x1023 molecules/mole, the number of molecules of the template per gram can be calculated:
mol/g * molecules/mol = molecules/ g
Finally, the number of molecules or number of copies of template in the sample can be estimated by multiplying by 1*109 to convert to ng and then multiplying by the amount of template (in ng)
This calculator requires the user to input the amount of a template present (in ngs) and the length of the template (in bp) and with this information the number of copies of the template is calculated.
The formula used is:
number of copies = ( amount * 6.022x1023) / (length * 1x109 * 650)
number = (ng * number/mole) / (bp * ng/g * g/ mole of bp)
