# Supplementary material for: One-step multiplex real-time RT-PCR assay for detecting and genotyping wild-type group A rotavirus strains and vaccine strains (Rotarix® and RotaTeq®) in stool samples
Source: PeerJ. 2016 Jan 11;4:e1560. doi: 10.7717/peerj.1560 (PMC4734446; doi:10.7717/peerj.1560)
Supplement: Supplemental Information 15 [file peerj-04-1560-s015.xls]

## Sheet: Sheet1
Concentration	Dillution	Volume (uL)	Mass (ng)	Length, bp	Copy number	Log copy	Ct	Ct	Ct avarage
ng/uL		(sample/assay)		(amplicon)
22.85	0.1	0.2	0.457	1062	3.927e+08	8.59406
22.85	0.01	0.2	0.0457	1062	3.927e+07	7.59406	15.24	14.4	14.82
22.85	0.001	0.2	0.00457	1062	3.927e+06	6.59406	18.17	18.2	18.185
22.85	0.0001	0.2	0.000457	1062	392700	5.59406	21.3	21.05	21.175
22.85	1e-05	0.2	4.57e-05	1062	39270	4.59406	25	25.18	25.09
22.85	1e-06	0.2	4.57e-06	1062	3927	3.59406	29.21	29.46	29.335
22.85	1e-07	0.2	4.57e-07	1062	392.7	2.59406	32.2	32.01	32.105
22.85	1e-08	0.2	4.57e-08	1062	39.27	1.59406
22.85	1e-09	0.2	4.57e-09	1062	3.927	0.594061
22.85	1e-10	0.2	4.57e-10	1062	0.3927	-0.405939
22.85	1e-11	0.2	4.57e-11	1062	0.03927	-1.40594
22.85	1e-12	0.2	4.57e-12	1062	0.003927	-2.40594
22.85	1e-13	0.2	4.57e-13	1062	0.0003927	-3.40594
22.85	1e-14	0.2	4.57e-14	1062	3.927e-05	-4.40594
22.85	1e-15	0.2	4.57e-15	1062	3.927e-06	-5.40594
22.85	1e-16	0.2	4.57e-16	1062	3.927e-07	-6.40594				slope	-3.5369
22.85	1e-17	0.2	4.57e-17	1062	3.927e-08	-7.40594				efficiency	0.917492
										%	91.7492
This calculation is based on the assumption that the average weight of a base pair (bp) is 650 Daltons. This means that one mole of a bp weighs 650 g and that the molecular weight of any double stranded DNA template can be estimated by taking the product of its length (in bp) and 650.
The inverse of the molecular weight is the number of moles of template present in one gram of material.
Using Avogadro's number, 6.022x1023 molecules/mole, the number of molecules of the template per gram can be calculated:
mol/g * molecules/mol = molecules/ g
Finally, the number of molecules or number of copies of template in the sample can be estimated by multiplying by 1*109 to convert to ng and then multiplying by the amount of template (in ng)
This calculator requires the user to input the amount of a template present (in ngs) and the length of the template (in bp) and with this information the number of copies of the template is calculated.
The formula used is:
number of copies = ( amount * 6.022x1023) / (length * 1x109 * 650)
number = (ng * number/mole) / (bp * ng/g * g/ mole of bp)
